# Supplementary material
Source: HighWire-hosted journal article supplement (https://thorax.bmj.com/content/72/2/154)

**On line Table 1: Lobar Distribution of HRCT Scan Abnormalities in the PCD Study Population (n = 64).**

| Variables                  | Right superior lobe | Middle lobe | Right lower lobe | Culmen   | Lingula  | Left lower lobe |
|----------------------------|---------------------|-------------|------------------|----------|----------|-----------------|
| Extent of bronchiectasis   | 71,9 §              | 78,1        | 89,1             | 65,6 *,§ | 65,6 *,§ | 93,8            |
| Severity of bronchiectasis | 73,4                | 79,7        | 90,6             | 65,6 *,§ | 67,2 *,§ | 93,8            |
| Peribronchial thickening   | 50 *,§              | 67,2        | 79,7             | 48,4 *,§ | 48,4 *,§ | 78,1            |

Data are presented in % patients. \* : p<0.0001 vs. right lower lobe. §: p<0.0001 vs. left lower lobe.

**On line Table 2: Main phenotypes and genotypes characteristics of PCD patients.**

| Patient | Sex | Situs inversus | Ethnicity | Consanguinity | Familial history of PCD | Nasal NO (nL/min) | Ultramicroscopic ciliary defect | Genetic anomaly | Extrapulmonary Impairment                  | Sterility/hypofertility |
|---------|-----|----------------|-----------|---------------|-------------------------|-------------------|---------------------------------|-----------------|--------------------------------------------|-------------------------|
| 1       | M   | Yes            | M/E       | No            | Yes                     | ND                | ODA                             | DNAI1           |                                            | U                       |
| 2       | M   | No             | Eu        | No            | No                      | 0                 | ODA + IDA                       | None            |                                            | No                      |
| 3       | F   | No             | WI/SSA    | Yes           | No                      | 6                 | ODA                             | DNAH5           |                                            | U                       |
| 4       | M   | Yes            | WI/SSA    | No            | Yes                     | 17                | ODA + IDA                       | LRRC50=DNAAF1   |                                            | Yes                     |
| 5       | M   | Yes            | M/E       | Yes           | Yes                     | 15*               | ODA                             | None            |                                            | No                      |
| 6       | M   | No             | M/E       | No            | No                      | 38                | IDA                             | CCDC39          |                                            | Yes                     |
| 7       | M   | Yes            | Eu        | No            | No                      | 0                 | Normal                          | DNAH11          |                                            | U                       |
| 8       | F   | No             | Eu        | No            | Yes                     | 103               | ODA                             | ND              |                                            | U                       |
| 9       | M   | Yes            | M/E       | Yes           | No                      | ND                | ODA + IDA                       | DYX1C1          |                                            | U                       |
| 10      | F   | Yes            | M/E       | No            | No                      | ND                | ODA + IDA                       | LRRC50=DNAAF1   |                                            | Yes                     |
| 11      | F   | Yes            | M/E       | No            | No                      | ND                | ODA + IDA                       | LRRC50=DNAAF1   | Psychomotor impairment                     | U                       |
| 12      | M   | No             | M/E       | No            | Yes                     | ND                | CC                              | RSPH4A          |                                            | No                      |
| 13      | M   | No             | M/E       | Yes           | Yes                     | ND                | CC                              | RSPH9           |                                            | U                       |
| 14      | F   | Yes            | M/E       | Yes           | Yes                     | 19                | ODA                             | DNAI1           |                                            | U                       |
| 15      | M   | Yes            | M/E       | No            | Yes                     | 11                | ODA                             | DNAI1           |                                            | U                       |
| 16      | F   | Yes            | Eu        | No            | No                      | ND                | Normal                          | DNAH11          |                                            | No                      |
| 17      | F   | No             | Eu        | No            | No                      | 105               | CC                              | Hydin           |                                            | U                       |
| 18      | F   | Yes            | Eu        | No            | No                      | ND                | ND                              | ND              |                                            | U                       |
| 19      | F   | Yes            | Eu        | No            | No                      | 0                 | ODA                             | ND              | Polycystic kidney disease                  | U                       |
| 20      | F   | No             | SA        | No            | No                      | 17*               | Normal                          | Hydin           |                                            | U                       |
| 21      | M   | Yes            | Eu        | Yes           | Yes                     | ND                | ODA + IDA                       | None            | Polycystic kidney disease                  | Yes                     |
| 22      | M   | Yes            | M/E       | Yes           | No                      | 75                | ODA                             | DNAI1           |                                            | U                       |
| 23      | F   | No             | Eu        | Yes           | No                      | ND                | ODA                             | DNAI2           |                                            | U                       |
| 24      | M   | No             | Eu        | No            | No                      | ND                | CC                              | None            |                                            | U                       |
| 25      | M   | No             | Eu        | No            | No                      | 119               | CC                              | None            |                                            | U                       |
| 26      | M   | No             | Eu        | No            | Yes                     | 98                | ODA + IDA                       | RPGR            | Psychomotor impairment, Retinis pigmentosa | U                       |

|    |   |     |        |     |     |      |           |        |                                         |     |
|----|---|-----|--------|-----|-----|------|-----------|--------|-----------------------------------------|-----|
| 27 | M | No  | Eu     | No  | Yes | ND   | ODA + IDA | RPGR   | Retinis pigmentosa                      | No  |
| 28 | F | No  | Eu     | Yes | No  | ND   | IDA       | None   |                                         | Yes |
| 29 | F | Yes | Eu     | No  | No  | ND   | ND        | ND     |                                         | No  |
| 30 | M | Yes | Eu     | No  | No  | 11   | ODA + IDA | None   |                                         | No  |
| 31 | F | Yes | Eu     | No  | No  | ND   | ODA + IDA | None   |                                         | No  |
| 32 | F | No  | Tu     | Yes | No  | 14   | CC        | None   |                                         | U   |
| 33 | F | Yes | M/E    | Yes | No  | ND   | IDA       | CCDC39 |                                         | U   |
| 34 | M | No  | Eu     | No  | No  | 93   | CC        | ND     |                                         | U   |
| 35 | M | No  | Eu     | Yes | Yes | 86   | ODA + IDA | RPGR   | Retinis pigmentosa                      | U   |
| 36 | M | No  | Eu     | No  | Yes | 25   | ODA + IDA | RPGR   |                                         | U   |
| 37 | M | No  | Eu     | No  | No  | 211  | ODA + IDA | None   | Psychomotor impairment,<br>polydactylia | U   |
| 38 | F | No  | Eu     | No  | Yes | ND   | ND        | ND     |                                         | No  |
| 39 | M | Yes | Eu     | No  | No  | ND   | ND        | ND     |                                         | U   |
| 40 | F | Yes | Eu     | No  | No  | 402* | ND        | ND     |                                         | No  |
| 41 | M | No  | Eu     | Yes | No  | 150  | Normal    | ND     |                                         | U   |
| 42 | F | No  | Eu     | Yes | No  | 11   | ODA       | DNAI1  |                                         | No  |
| 43 | M | No  | M/E    | No  | No  | 54   | CC        | None   |                                         | Yes |
| 44 | M | Yes | M/E    | Yes | Yes | ND   | ODA       | DNAH5  |                                         | No  |
| 45 | M | Yes | Asia   | No  | No  | ND   | ND        | ND     |                                         | U   |
| 46 | M | No  | Eu     | No  | No  | 2    | ODA + IDA | None   |                                         | U   |
| 47 | M | No  | M/E    | No  | Yes | 6    | CC        | RSPH9  |                                         | U   |
| 48 | F | No  | Eu     | No  | No  | 19*  | ODA       | DNAI1  |                                         | U   |
| 49 | F | No  | Europe | No  | No  | 14*  | ODA + IDA | None   |                                         | No  |
| 50 | M | Yes | M/E    | No  | No  | ND   | ODA + IDA | ND     |                                         | Yes |
| 51 | F | No  | Eu     | No  | No  | ND   | CC        | None   |                                         | U   |
| 52 | F | Yes | Eu     | No  | No  | ND   | ODA       | DNAH5  |                                         | Yes |
| 53 | F | Yes | Eu     | No  | No  | 26   | ODA       | ND     |                                         | Yes |
| 54 | M | Yes | Eu     | No  | No  | ND   | ND        | ND     |                                         | Yes |
| 55 | M | Yes | Eu     | No  | Yes | ND   | ODA       | DNAH5  |                                         | Yes |
| 56 | M | No  | Eu     | No  | No  | ND   | CC        | ND     |                                         | Yes |

|    |   |     |        |     |     |      |           |        |  |     |
|----|---|-----|--------|-----|-----|------|-----------|--------|--|-----|
| 57 | F | No  | Eu     | No  | No  | 190* | CC        | RSPH1  |  | U   |
| 58 | M | Yes | Eu     | No  | No  | ND   | ND        | ND     |  | No  |
| 59 | F | No  | M/E    | No  | No  | ND   | ND        | ND     |  | Yes |
| 60 | M | Yes | Eu     | No  | Yes | 22   | IDA       | CCDC39 |  | Yes |
| 61 | F | No  | Eu     | Yes | No  | 99*  | ODA + IDA | None   |  | No  |
| 62 | F | Yes | Asia   | No  | No  | 5    | ODA       | ND     |  | No  |
| 63 | F | Yes | Eu     | No  | No  | ND   | ND        | ND     |  | No  |
| 64 | M | Yes | WI/SSA | No  | No  | ND   | IDA       | CCDC39 |  | Yes |
| 65 | M | No  | Eu     | No  | No  | 4    | CC        | RSPH4A |  | No  |
| 66 | M | No  | Eu     | No  | No  | 9    | CC        | RSPH4A |  | No  |
| 67 | M | Yes | Eu     | No  | No  | ND   | ODA + IDA | ND     |  | Yes |
| 68 | M | No  | Eu     | No  | No  | 11   | IDA       | ND     |  | Yes |
| 69 | M | No  | Eu     | No  | No  | 55   | CC        | RSPH1  |  | Yes |
| 70 | F | Yes | M/E    | No  | No  | 74   | ND        | ND     |  | U   |
| 71 | M | No  | M/E    | No  | No  | 13*  | IDA       | CCDC40 |  | U   |
| 72 | F | Yes | Asia   | Yes | No  | ND   | ODA + IDA | None   |  | U   |
| 73 | M | Yes | M/E    | No  | No  | 2    | IDA       | CCDC39 |  | Yes |
| 74 | M | No  | Eu     | No  | No  | 85   | ODA + IDA | None   |  | U   |
| 75 | M | No  | Tu     | No  | No  | 210* | ODA       | DNAH5  |  | No  |
| 76 | M | Yes | Eu     | No  | No  | ND   | Normal    | DNAH11 |  | U   |
| 77 | M | No  | Eu     | No  | No  | 6    | IDA       | CCDC39 |  | U   |
| 78 | F | No  | S/A    | No  | No  | 18   | ODA       | DNAAF2 |  | U   |

Abbreviations: M/E= Maghreb/Egypt, WI/SSA = West Indies/Sub-Saharan Africa, Eu = Europe, SA = South America, T = Turkey

ODA = ODA defect, IDA = absence of IDA with axonemal disorganization, ODA + IDA = absence of both dynein arms, CC = abnormal central complex

PI : Psychomotor impairment, RP : Retinis pigmentosa, PKD : Polycystic kidney disease

ND = no data, U = unknown, \* : several measurements available

**On line figureS1 : Respiratory function of PCD patients.**

**Figure s1A** shows the linear regression on courses of FEV<sub>1</sub> (mL) from their first lung function measurement in adulthood ( $\geq 18$  years). Each regression line represents one patient.

**Figure s1B** shows the relationship between last FEV<sub>1</sub> available (% predicted) and age (years); Spearman rank correlation coefficient  $\rho = -0.246$  and  $p = 0.029$ .

**Figure s1C** shows the relationship between last FEV<sub>1</sub> available (% predicted) and BMI ( $\text{kg}/\text{m}^2$ ); Spearman rank correlation coefficient  $\rho = -0.283$  and  $p = 0.012$

**Figure s1A**

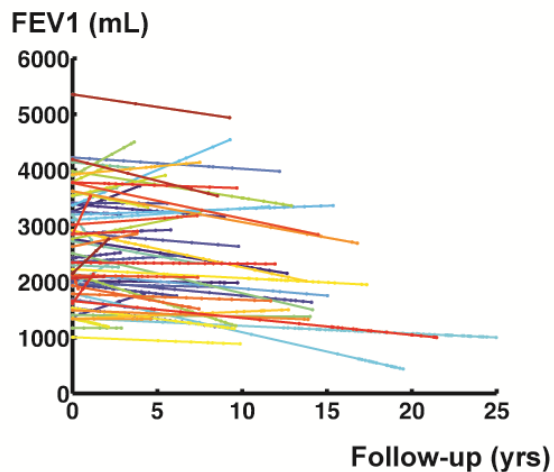

**Figure s1B**

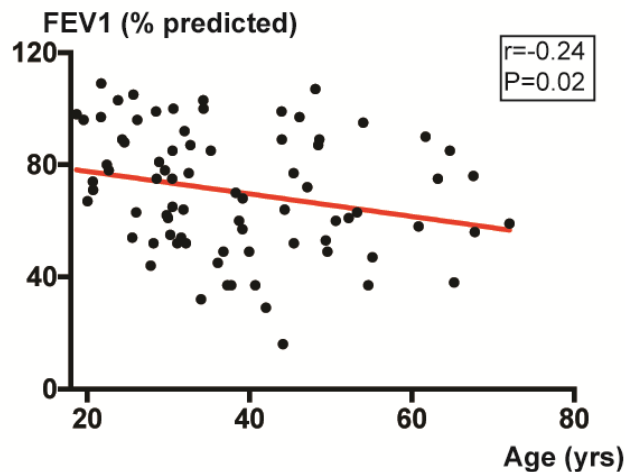

**Figure s1C**

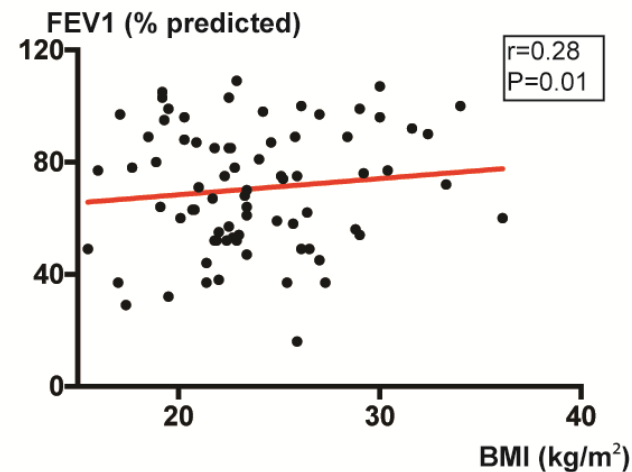

Supplement: inline-supplementary-material-1 [file inline-supplementary-material-1.pdf]
